# Supplementary material for: NRF2 Regulates Viability, Proliferation, Resistance to Oxidative Stress, and Differentiation of Murine Myoblasts and Muscle Satellite Cells
Source: MDPI journal article supplement (doi:10.3390/cells11203321), 2022-10-21
Supplement: s1 [file s1]

**A**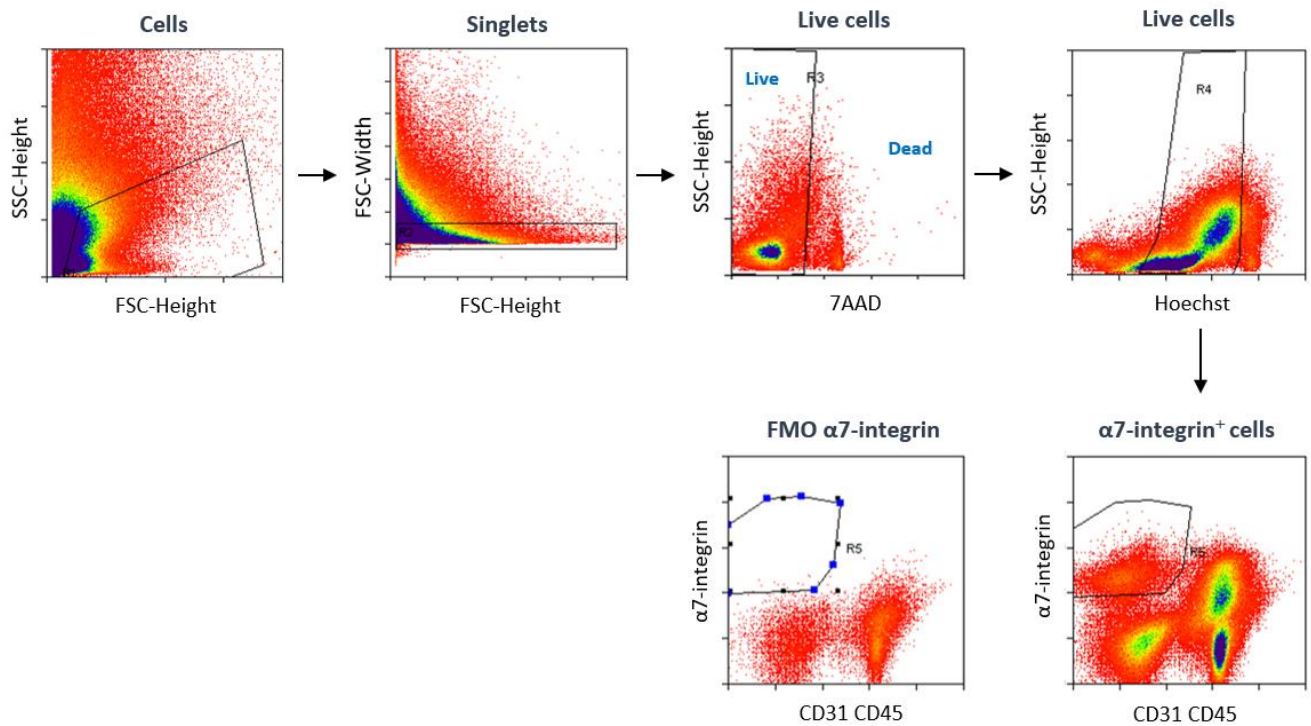**B**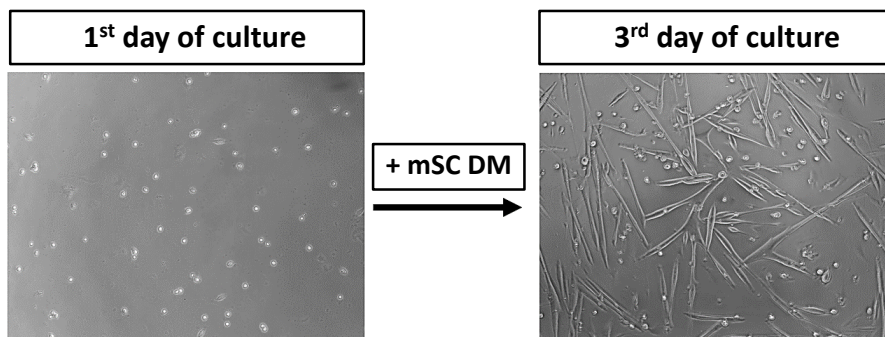

**Figure S1:** (A) Gating strategy used to sort mSCs from murine skeletal muscle. (B) Morphology of mSC on the first day after sorting and on the third day of differentiation. DM—differentiation medium.
